# Supplementary material
Source: PubMed Central journal article supplement (PMC2758731)

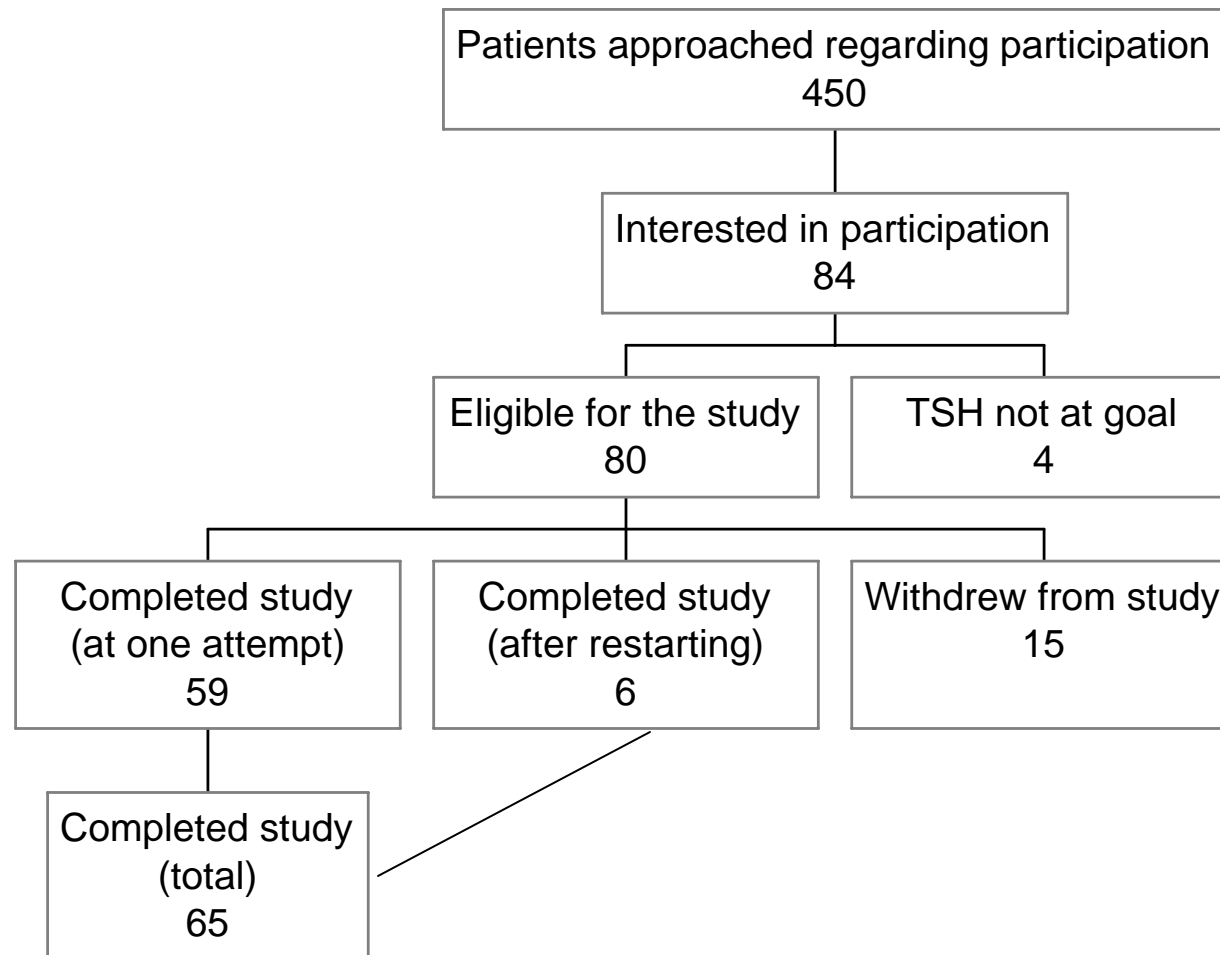

Supplemental Figure 1. Study recruitment

Supplement: jc.2009-0860_1.pdf [file jc.2009-0860_1.pdf]
